# Supplementary material for: EBI2 is a negative modulator of brown adipose tissue energy expenditure in mice and human brown adipocytes
Source: PubMed Central journal article supplement (PMC8964700; doi:10.1038/s42003-022-03201-6), 2022-03-29
Supplement: 42003_2022_3201_MOESM1_ESM.pdf [file 42003_2022_3201_MOESM1_ESM.pdf]

## Supplementary information

### **EBI2 is a negative modulator of brown adipose tissue energy expenditure in mice and human brown adipocytes**

**Authors:** Francesca Copperi<sup>1,2</sup>, Inna Schleis<sup>1</sup>, Martin Roumain<sup>3</sup>, Giulio G. Muccioli<sup>3</sup>, Stefano Casola<sup>4</sup>, Martin Klingenspor<sup>5,a,b</sup>, Alexander Pfeifer<sup>1</sup>, Thorsten Gnad<sup>1\*</sup>

**Affiliation:** <sup>1</sup>Institute of Pharmacology and Toxicology, University Hospital Bonn, University of Bonn, Bonn, 53127, Germany; <sup>2</sup>Research Training Group 1873, University of Bonn, Bonn, 53127, Germany; <sup>3</sup>Bioanalysis and Pharmacology of Bioactive Lipids Research Group, Louvain Drug Research Institute, UCLouvain, Université catholique de Louvain, 1200 Bruxelles, Belgium. <sup>4</sup>The FIRC Institute of Molecular Oncology (IFOM), Milan, 20139, Italy. <sup>5</sup>Molecular Nutritional Medicine, TUM School of Life Sciences, Technical University of Munich, 85354 Freising, Germany. <sup>a</sup>EKFZ - Else Kröner-Fresenius Center for Nutritional Medicine, Technical University of Munich, 85354 Freising, Germany. <sup>b</sup>ZIEL - Institute for Food & Health, Technical University of Munich, 85354 Freising, Germany.

\* Corresponding author: [tgnad@uni-bonn.de](mailto:tgnad@uni-bonn.de)

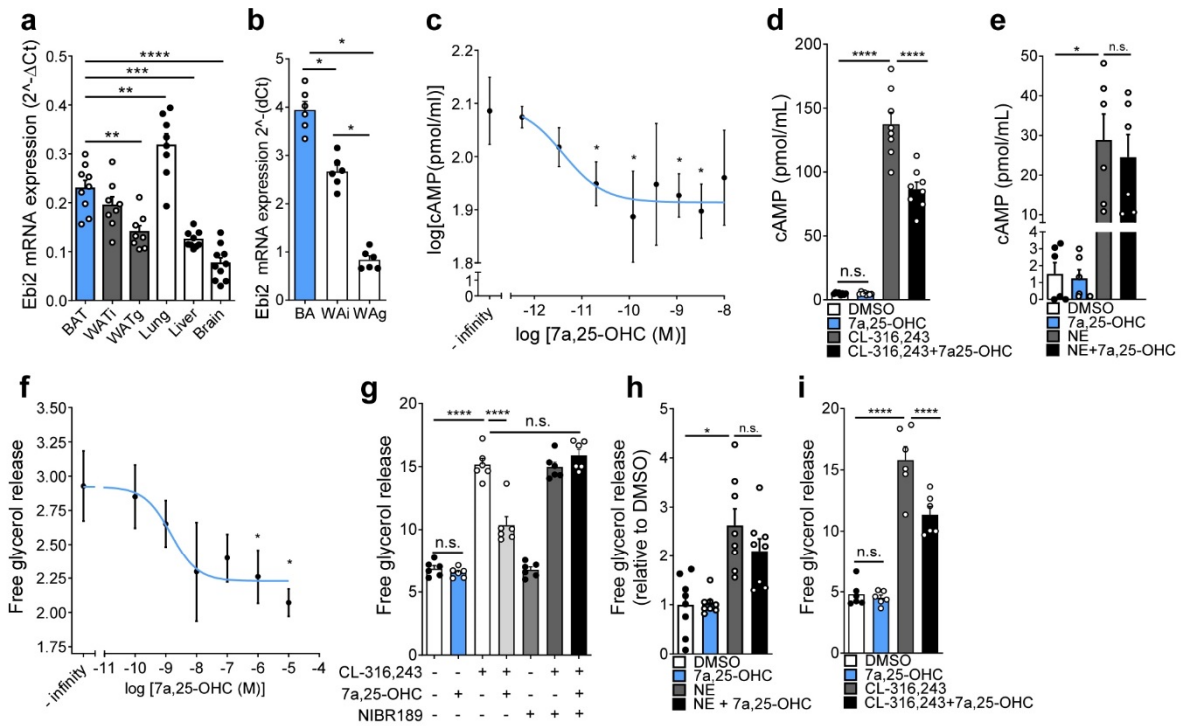

### Supplementary Figure 1. $7\alpha,25\text{-OHC}$ treatment of BA and WA

**a** Ebi2 mRNA expression in ATs and other relevant organs (n=8-10). **b** Ebi2 mRNA expression in adipocytes (n=6). **c** Dose dependent NE-induced intracellular cAMP decrease after  $7\alpha,25\text{-OHC}$  treatment of BA (n=7-14). **d**  $7\alpha,25\text{-OHC}$  (1  $\mu\text{M}$ ) effect on CL-316,243-induced (1  $\mu\text{M}$ ) intracellular cAMP in BA (n=8). **e** Intracellular cAMP levels in WA treated with NE (1  $\mu\text{M}$ ) and  $7\alpha,25\text{-OHC}$  (1  $\mu\text{M}$ ) (n=6). **f** Dose dependent NE-induced lipolysis decrease after  $7\alpha,25\text{-OHC}$  treatment of BA (n=3-9). **g**  $7\alpha,25\text{-OHC}$  (1  $\mu\text{M}$ ) and NIBR189 (10  $\mu\text{M}$ ) effect on CL-316,243-induced (1  $\mu\text{M}$ ) lipolysis in BA (n=6). **h** Relative lipolysis of WA treated with NE (1  $\mu\text{M}$ ) and  $7\alpha,25\text{-OHC}$  (1  $\mu\text{M}$ ) (n=8). **i**  $7\alpha,25\text{-OHC}$  effect on CL-316,243-induced (1  $\mu\text{M}$ ) lipolysis in hMADs (n=6). Mean  $\pm$  s.e.m., one-way ANOVA with Tukey post-hoc test and two-way ANOVA, \*p<0.05, \*\*p<0.01, \*\*\*p<0.001, \*\*\*\*p<0.0001.

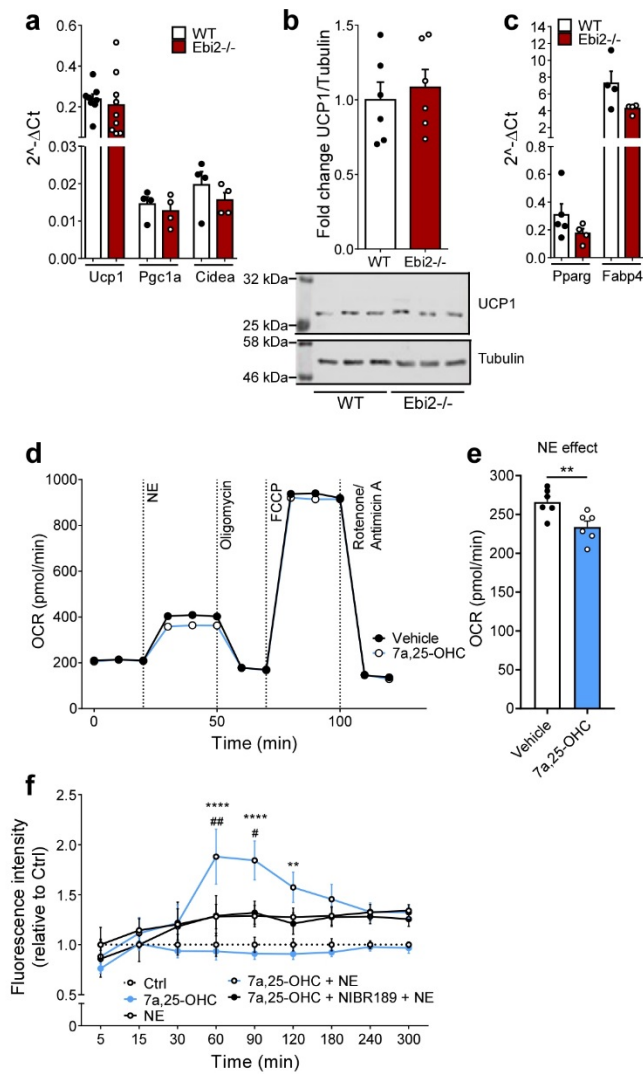

**Supplementary Figure 2. Marker gene expression of EB12<sup>-/-</sup> BA and ROS production after EB12 activation**  
**a** Thermogenic genes mRNA expression in WT and EB12<sup>-/-</sup> BA (n=4-10). **b** UCP1 immunoblot of WT and EB12<sup>-/-</sup> BA (n=4). **c** Adipogenic genes mRNA expression in WT and EB12<sup>-/-</sup> BA (n=4-5). **d,e** In vitro respirometry of human BA pre-treated with 7α,25-OHC (1μM) or vehicle (n=6). **f** Time course of ROS production by BA treated with NE (1μM), 7α,25-OHC (1μM), NIBR189 (10μM) and H<sub>2</sub>O<sub>2</sub> (3%) (n=4). Mean ± s.e.m., student's t-test and two-way ANOVA, #p<0.05, ##/\*\*p<0.01, \*\*\*\*p<0.00001.

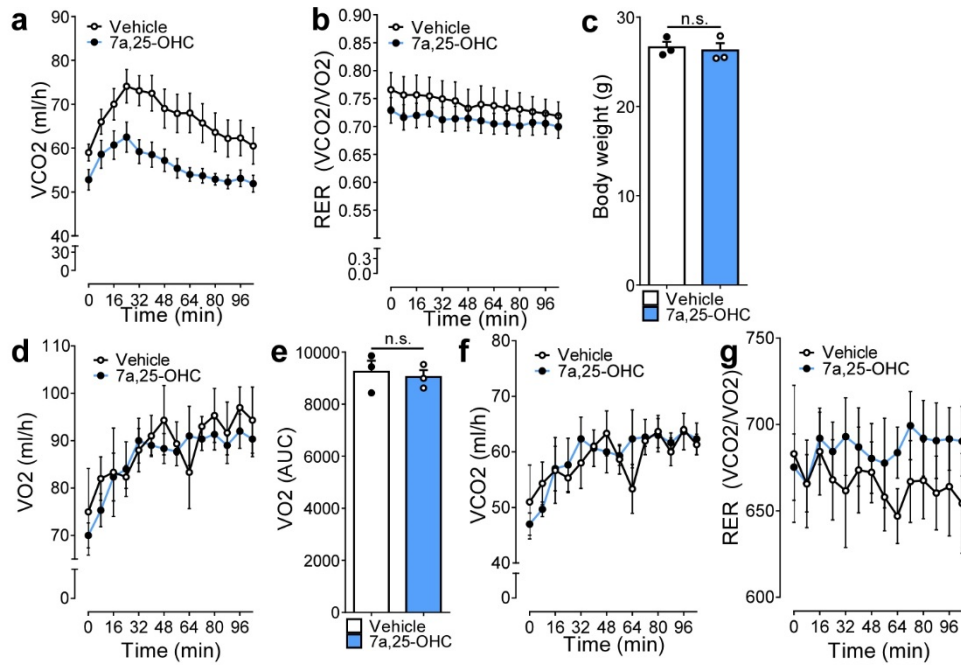

**Supplementary Figure 3. Effects of EB12 activation on whole body metabolism.**

**a-c** CO<sub>2</sub> production **a** RER **b** and body weight **c** of WT mice injected with 7α,25-OHC (5 mg/kg i.p.) (n=10 and n=3). **d-g** Energy expenditure (VO<sub>2</sub>) **d,e**, CO<sub>2</sub> production **f**, and RER **g** after injection of 7α,25-OHC (5 mg/kg i.p.) in EB12<sup>-/-</sup> mice (n=3). Mean ± s.e.m., student's t-test and two-way ANOVA.

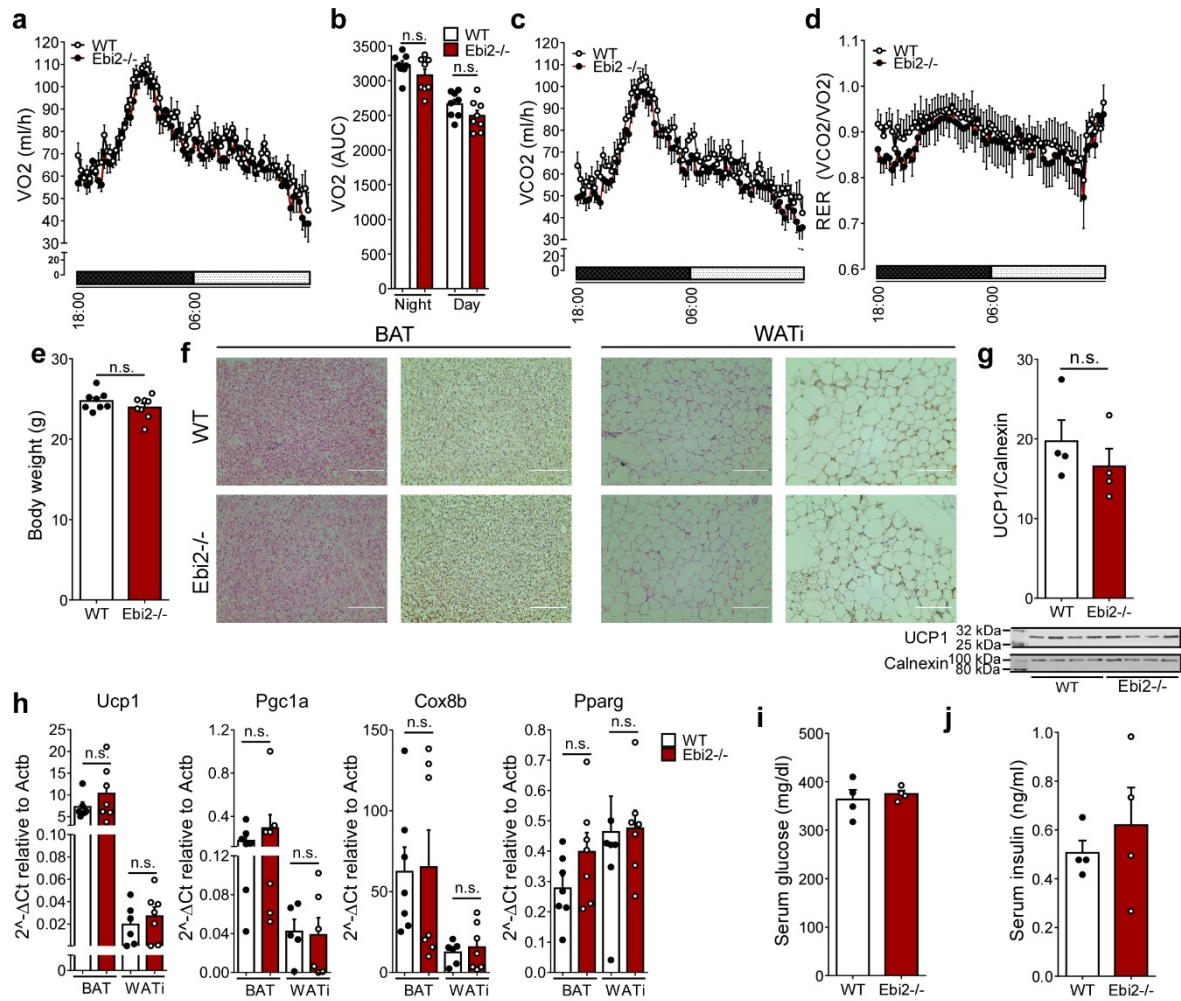

**Supplementary Figure 4. Metabolism of EBI2<sup>-/-</sup> mice at 23°C**

**a-e** Energy expenditure **a**, **b** CO<sub>2</sub> production **c** RER **d** and body weight **e** of WT and EBI2<sup>-/-</sup> mice at 23°C (n=8). **f** HE and UCP1 staining of BAT and WAT1 of WT and EBI2<sup>-/-</sup> mice (scale bar 100 μm). **g** Representative UCP1 immunoblot and relative quantification in BAT of WT and EBI2<sup>-/-</sup> mice at 23°C (n=4). **h** Thermogenic and adipogenic genes mRNA expression in ATs of WT and EBI2<sup>-/-</sup> mice at 23°C (n=7). **i, j** Serum glucose **i** and insulin **j** levels of WT and EBI2<sup>-/-</sup> mice at 23°C (n=4). Mean ± s.e.m., two-way ANOVA and student's t-test.

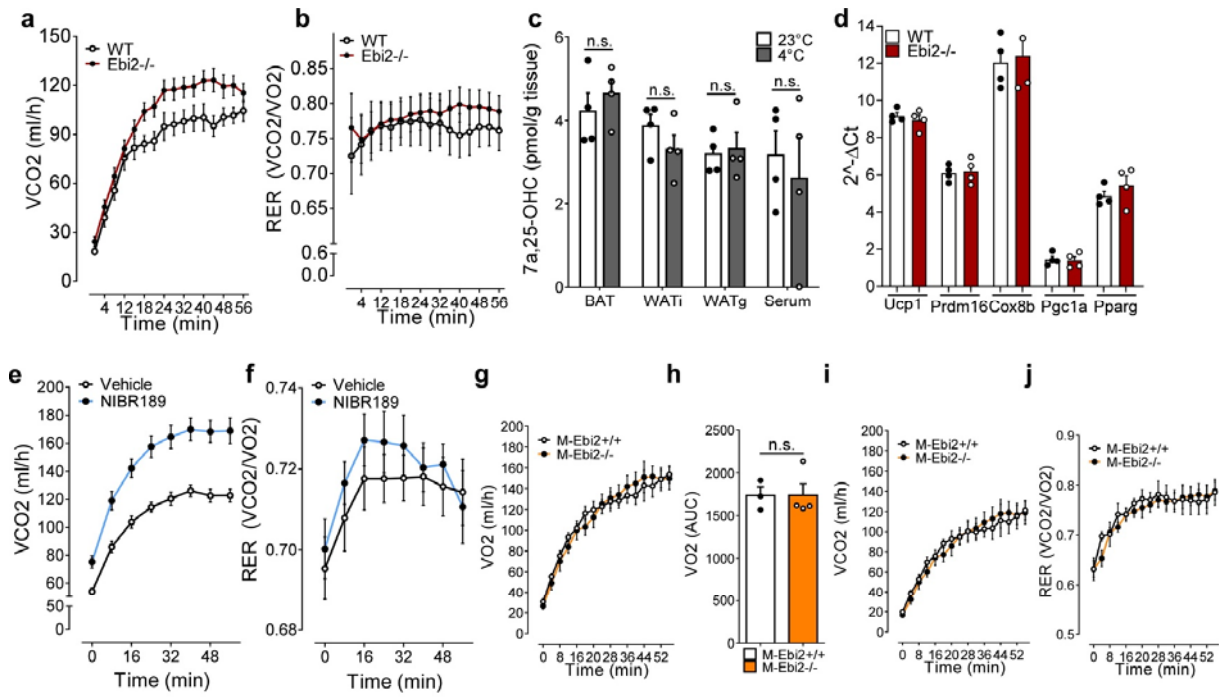

**Supplementary Figure 5. Acute cold exposure of EB12 mouse models**

**a,b** CO<sub>2</sub> production **a** and RER **b** of WT and EBI2<sup>-/-</sup> mice in acute cold exposure (4°C) (n=5-6). **c** 7 $\alpha$ ,25-OHC levels in ATs and serum before and after 1 h of cold exposure (4°C) (n=4). **d** Adipogenic and thermogenic genes expression upon 1h of cold exposure (4°C) of WT and EBI2<sup>-/-</sup> mice (n=4). **e,f** VCO<sub>2</sub> **e** and RER **f** upon NIBR189 injection in acute cold exposure (4°C) (n=12). **g-j** O<sub>2</sub> consumption **g,h** CO<sub>2</sub> production **i** and RER **j** of M-EBI2<sup>+/+</sup> and M-EBI2<sup>-/-</sup> mice during 1h cold exposure (4°C) (n=4). Mean  $\pm$  s.e.m

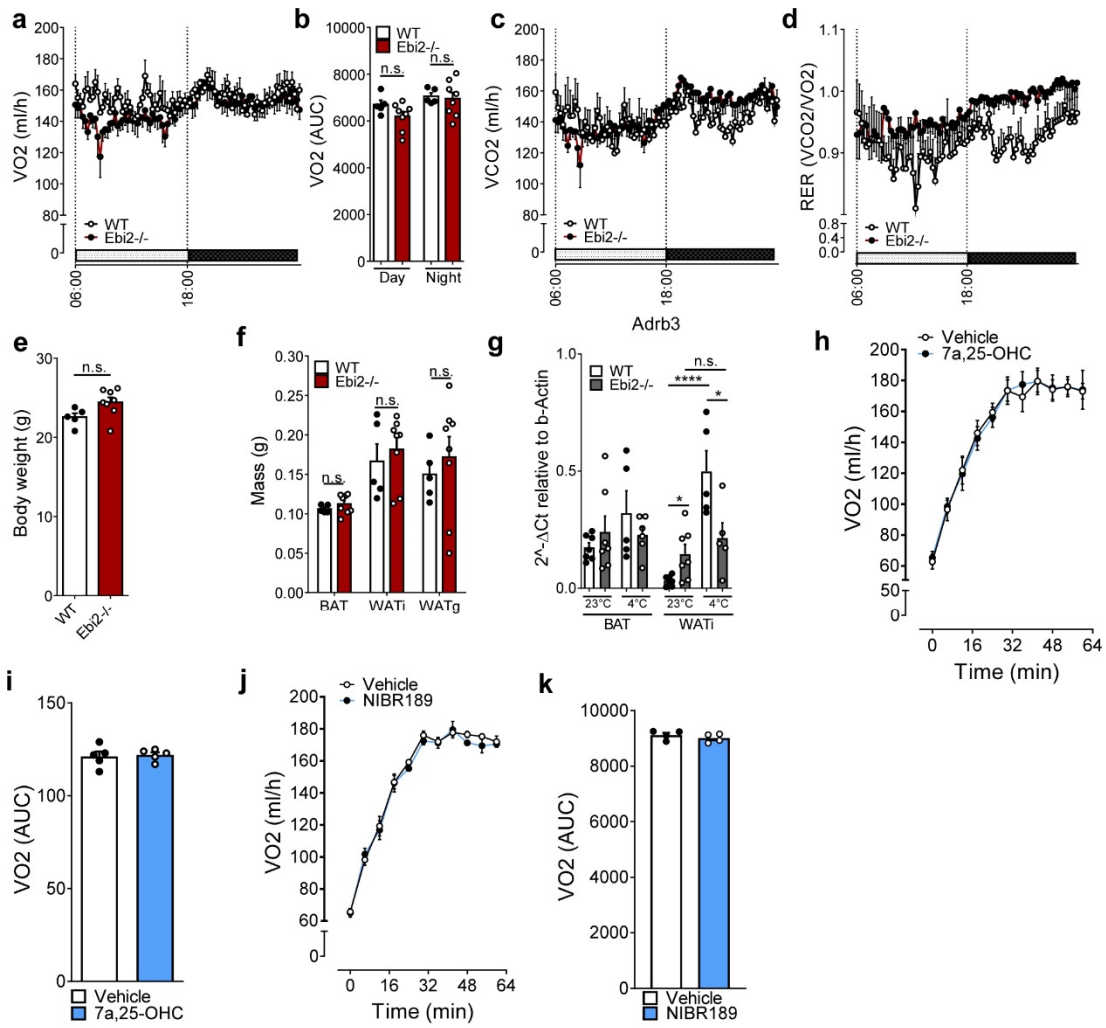

**Supplementary Figure 6. Metabolism of  $Ebi2^{-/-}$  mice**

**a-b**  $O_2$  consumption **c**  $CO_2$  production **d** RER **e** body weight **f** adipose tissues weight **g** and  $\beta_3$ -AR expression in thermogenic fat depots of  $Ebi2^{-/-}$  or WT mice after prolonged cold exposure (1 week at 4°C) (n=5-8). **h-k**  $VO_2$  of  $Ebi2^{-/-}$  mice upon injection of 7 $\alpha,25$ -OHC **h,i** or NIBR189 **j,k** after cold exposure (16°C) (n=4-5). Mean  $\pm$  s.e.m., one-way and two-way ANOVA and student's t-test, \* $p < 0.05$ , \*\*\*\* $p < 0.0001$ .

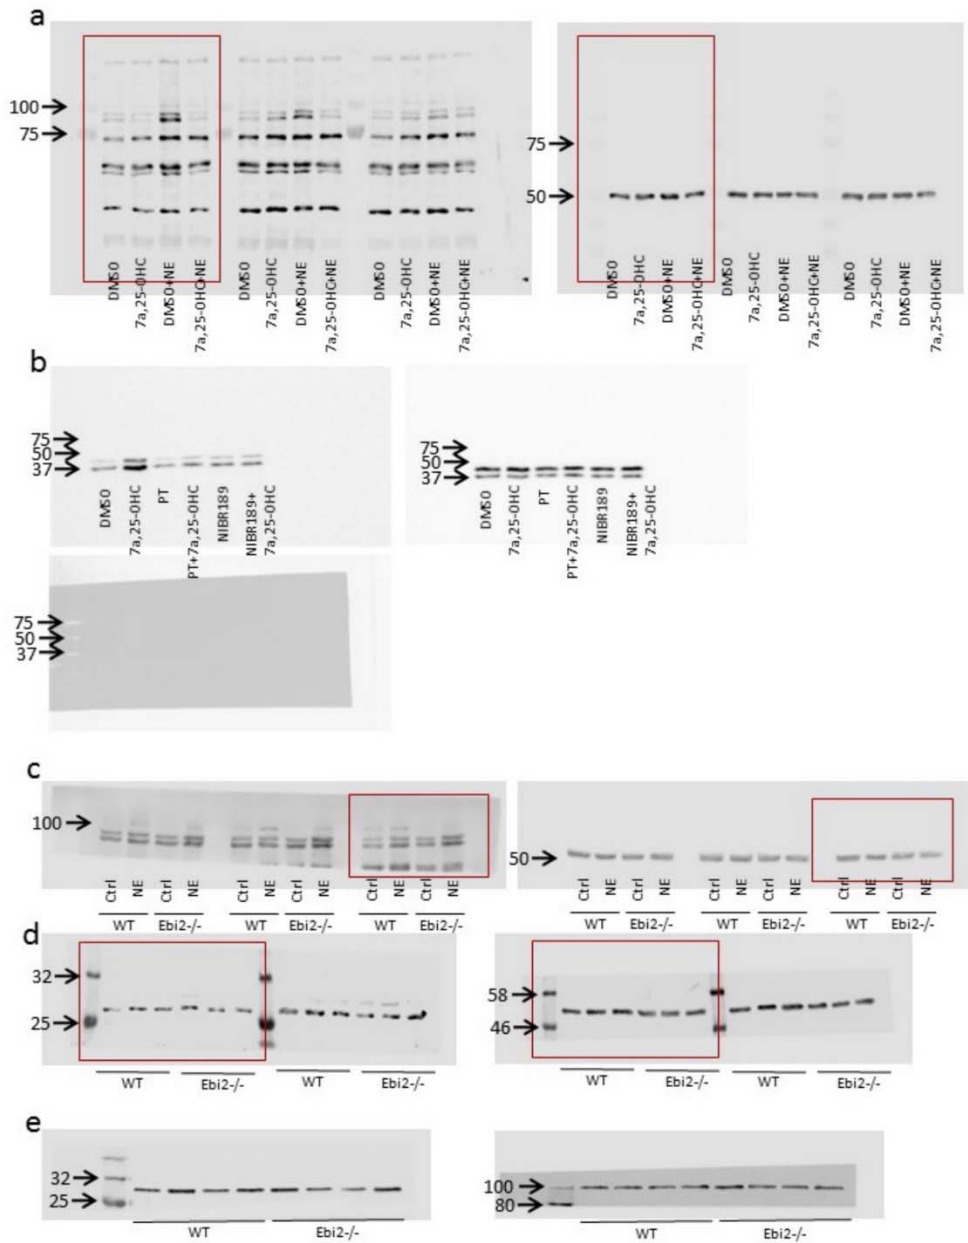

**Supplementary Figure 7. Uncropped Immunoblots.** **a** p-HSL (left) and tubulin (right), uncropped immunoblot shown in Figure 1f. **b** p-ERK1/2 (upper left), total-ERK1/2 (upper right) and ladder (bottom), uncropped immunoblot shown in Figure 1i. **c** p-HSL (left) and tubulin (right), uncropped immunoblot shown in Figure 2g. **d** UCP1 (left) and tubulin (right), uncropped immunoblot shown in Supplementary Figure 2b. **e** UCP1 (left) and calnexin (right), uncropped immunoblot shown in Supplementary Figure 4g. When other samples not presented in the figures were present on the same immunoblot, the part presented in the figures is framed in red.



**Supplementary Table 1. Expression of Gi coupled GPCR in BAT**

| <b>Gi GPCR</b> | <b>Abundance (2<sup>-dCt</sup>)</b> | <b>s.e.m.</b> |
|----------------|-------------------------------------|---------------|
| GPR183         | 0.2033                              | 0.0754        |
| CMKLR1         | 0.0547                              | 0.0064        |
| GPR81          | 0.0533                              | 0.0068        |
| Adra2b         | 0.0523                              | 0.0043        |
| C5AR           | 0.0383                              | 0.0048        |
| NyB4           | 0.0267                              | 0.0094        |
| GPR34          | 0.025                               | 0.0069        |
| SSTR4          | 0.0237                              | 0.0041        |
| S1PR1          | 0.0193                              | 0.0027        |
| SSTR1          | 0.0047                              | 0.0009        |
| CCR3           | 0.0043                              | 0.0003        |
| GPR18          | 0.0042                              | 0.0002        |
| Adora1         | 0.0034                              | 0.0009        |
| GABA B1        | 0.0025                              | 0.0003        |
| Adra2a         | 0.0025                              | 0.001         |
| CXCR2          | 0.0024                              | 0.0004        |
| CXCR6          | 0.0011                              | 0.0001        |
| CHRM4          | 0.0267                              | 0.0094        |
| AGTR2          | 0.0043                              | 0.0003        |
