# Supplementary material for: EBI2 is a negative modulator of brown adipose tissue energy expenditure in mice and human brown adipocytes
Source: PubMed Central journal article supplement (PMC8964700; doi:10.1038/s42003-022-03201-6), 2022-03-29
Supplement: 42003_2022_3201_MOESM2_ESM.pdf [file 42003_2022_3201_MOESM2_ESM.pdf]

## Description of Additional Supplementary Files

**File name:** Supplementary Data 1

**Description:** Source data used to generate the charts of the manuscript.
